# Supplementary material
Source: Research Square preprint supplement (doi:10.21203/rs.3.rs-9800171/v1)
Supplement: Supplementary file 1 [file ef8f3bfa90df0723d9075676.xlsx]

## Sheet: S1_Jstage
Table S1. Search strategy for J-Stage
Table S1. J-Stageの検索式
Item / 項目	Content / 内容
Database / データベース	J-Stage
Date searched / 検索日	4 December 2024 / 2024年12月4日
Search field / 検索フィールド	Title, abstract, and keyword (school non-attendance terms and reason terms); full text (school-grade terms) タイトル・抄録・キーワード(不登校系用語・理由系用語)、および全文(校種用語)
Date filter / 期間	2017–2024
Search string / 検索式	(title:(不登校 OR 行き渋り OR いきしぶり OR 行きしぶり OR いき渋り OR 五月雨登校) OR abstracttext:(不登校 OR 行き渋り OR いきしぶり OR 行きしぶり OR いき渋り OR 五月雨登校) OR keyword:(不登校 OR 行き渋り OR いきしぶり OR 行きしぶり OR いき渋り OR 五月雨登校)) AND dtcitation:[2017 TO 2024] AND (title:(理由 OR 要因 OR 原因 OR きっかけ OR 因子) OR abstracttext:(理由 OR 要因 OR 原因 OR きっかけ OR 因子) OR keyword:(理由 OR 要因 OR 原因 OR きっかけ OR 因子)) AND fulltext:(小学 OR 中学)
Records retrieved / ヒット件数	55

## Sheet: S2_CiNii
Table S2. Search strategy for CiNii Research
Table S2. CiNii Researchの検索式
Item / 項目	Content / 内容
Database / データベース	CiNii Research
Date searched / 検索日	4 December 2024 / 2024年12月4日
Search field / 検索フィールド	Free word (all fields) / フリーワード(全フィールド)
Date filter / 期間	2017–2024
Resource type / 資料種別	Articles, books, doctoral dissertations / 論文・図書・博士論文
Search string / 検索式	(不登校 OR 行き渋り OR いきしぶり OR 行きしぶり OR いき渋り OR 五月雨登校) AND (理由 OR 要因 OR 原因 OR きっかけ OR 因子) AND (小学 OR 中学)
Records retrieved / ヒット件数	81
Note / 注	The free-word search returned 116 records in total. Records were then restricted by resource type to articles (n = 79), books (n = 1), and doctoral dissertations (n = 1), yielding 81 records. Research data and project entries were excluded.
	フリーワード検索により全体で116件が得られた。このうち資料種別を論文(79件)・図書(1件)・博士論文(1件)に限定し、81件とした。「研究データ」および「プロジェクト」は除外した。

## Sheet: S3_Google
Table S3. Search strategy for Google
Table S3. Google検索の検索式
Item / 項目	Content / 内容
Database / データベース	Google
Date searched / 検索日	4 December 2024, incognito mode / 2024年12月4日、シークレットモード
Search field / 検索フィールド	Full web, restricted to PDF files / Web全体、PDFファイルに限定
Date filter / 期間	2017–2024 (set via Google Tools → Custom date range) 2017–2024(Google検索ツール → 期間指定で設定)
Search string / 検索式	(不登校 OR 行き渋り OR いきしぶり OR 行きしぶり OR いき渋り OR 五月雨登校) AND filetype:pdf
Records retrieved / ヒット件数	212
Note / 注	The search result list was harvested with EasyScraper (a Chrome extension). The 212 PDFs were then subjected to automated pre-screening prior to title/abstract screening: (a) automated download and text extraction via Python; (b) restriction to documents whose full text contained at least one school-grade term (小学 OR 中学), yielding 166 records; (c) restriction to documents whose full text containe…
	検索結果リストはChrome拡張機能EasyScraperを用いて取得した。212件のPDFには、タイトル・抄録スクリーニングの前段階として以下の自動前処理を施した: (a) PythonによるPDFの自動ダウンロードとテキスト抽出、(b) 全文に校種用語(小学 OR 中学)を1つ以上含むものに限定 — 166件、(c) 全文に理由系用語(理由 OR 要因 OR 原因 OR きっかけ OR 因子)を1つ以上含むものに限定 — 139件、(d) (b)と(c)の積集合 — 128件をタイトル・抄録スクリーニング対象とした。

## Sheet: S4_Codebook
Table S4. Coding scheme for classifying reasons for school non-attendance
Table S4. 不登校要因のコーディング枠組み
Domain / ドメイン	Factor (Japanese) / 要因(日本語)	Factor (English, rough) / 要因(英語・仮訳)	Note / 注
s = School (学校要因)	いじめ	Bullying
	友人関係(いじめを除く)	Peer relationships (excluding bullying)
	教職員との関係	Relationships with teachers and staff
	学業の不振	Poor academic performance
	進路に係る不安	Anxiety about future career path
	部活動・クラブ活動	Club and extracurricular activities
	学校のきまり・校則	School rules
	入学・転編入学・進級時の不適応	Maladjustment at entry, transfer, or grade transition
	学校の居心地・学級崩壊・集団生活	School atmosphere / classroom breakdown / group living
f = Family (家庭要因)	家庭の生活環境の急激な変化	Sudden changes in family living environment
	親子の関わり方	Parent–child relationship
	家庭内の不和	Family discord
	家族の世話・家事・介護	Caring for family / housework / caregiving
	親の学校に対する考え	Parental attitudes toward school	Includes responses such as “I felt my child did not need to attend.” 「行く必要はないと考えていた」等を含む。
p = Person (本人要因)	無気力・不安	Apathy and anxiety	Includes “I had no motivation” and “I did not understand the meaning of attending.” 「やる気が出ない」「行く意味がわからない」を含む。
	不安・抑うつ	Anxiety and depression
	生活リズムの乱れ	Disrupted daily rhythm
	遊び・非行	Recreation and delinquency
	身体の不調・体調不良	Physical complaints and poor health	Includes “I felt tired” and “I felt unwell.” 「疲れる」「体調が悪くなる」を含む。
	発達障害・特別支援	Developmental disabilities / special education needs	Includes sensory sensitivities. 「感覚の過敏さ」を含む。
	ネット・ゲーム・SNS	Internet, games, and social media
	個別の配慮(障害以外)	Individual accommodation needs (other than disability)
o = Other (その他)	該当なし・無回答	None applicable / no response
	その他	Other
	コロナ関連	COVID-19 related
	自分でもよくわからない・きっかけ不明	Unclear or unknown trigger
Note / 注	English labels are rough working translations provided for reference. The Japanese labels are authoritative and reflect the wording used during coding. 英語ラベルは参考のための仮訳である。コーディング時に用いた日本語ラベルが原典である。
